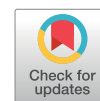

# 1,5-Anhydroglucitol: A Novel Biomarker of Adherence to Sodium–Glucose Cotransporter 2 Inhibitors

Diabetes Care 2024;47:e9–e10 | <https://doi.org/10.2337/dc23-2035>

Natalie R. Daya,<sup>1</sup> Michael Fang,<sup>1</sup> Mahesh Mathew,<sup>2</sup> Jung-Im Shin,<sup>1</sup> James Pankow,<sup>2</sup> Pamela L. Lutsey,<sup>2</sup> Arielle Valint,<sup>3</sup> Justin B. Echouffo-Tcheugui,<sup>1,4</sup> and Elizabeth Selvin<sup>1</sup>

In 2003, the U.S. Food and Drug Administration cleared the biomarker 1,5-anhydroglucitol (1,5-AG) (GlycoMark) for use in intermediate-term monitoring of glucose control in patients with diabetes (1,2). Serum concentrations of 1,5-AG reflect hyperglycemia exceeding the renal threshold over the prior 1–2 weeks (3). During periods of glycosuria (>180 mg/dL), glucose and 1,5-AG compete for reabsorption in the renal tubules, resulting in increased excretion of 1,5-AG in the urine and lower concentrations of 1,5-AG in the blood (4). Thus, 1,5-AG can be used to identify individuals who are experiencing episodes of hyperglycemia.

Sodium–glucose cotransporter 2 inhibitors (SGLT2i), first approved in 2013, are a class of medications that lower blood glucose by inhibiting the reabsorption of glucose in the renal tubules and increasing glucose excretion in the urine (5). The manufacturer of the 1,5-AG assay notes that SGLT2i use substantially lowers serum concentrations of 1,5-AG, which raises the possibility that 1,5-AG could be used as a biomarker of SGLT2i use and adherence.

A blood biomarker is potentially a more objective and accurate marker of medication adherence than self-reported medication use or data on medication prescriptions. Our objective was to evaluate 1,5-AG as a biomarker of SGLT2i

adherence by comparing concentrations of 1,5-AG among users and nonusers of SGLT2i in a community-based sample of adults with type 2 diabetes.

We included participants with diagnosed diabetes, defined as the use of any glucose-lowering medication, who participated in visit 6 (2016–2017), 7 (2018–2019), or 9 (2021–2022) of the Atherosclerosis Risk in Communities (ARIC) study. SGLT2i use was assessed by examination of medication bottles the participants were asked to bring to the visits. If a participant attended multiple visits, data from their most recent visit was included. If the participant reported use of SGLT2i at one visit but not at the following visit, data from the most recent visit reporting use of SGLT2i was included.

Serum 1,5-AG was measured using the GlycoMark assay (Precision Diabetes, Inc.). We examined characteristics of the study population and summary statistics according to SGLT2i use. We used frequency histograms and kernel density plots to examine the distribution of 1,5-AG by use of SGLT2i.

Among 937 participants with diabetes who were taking at least one glucose-lowering medication (mean age 81 years, 55% female, 62% White), 4.3% ( $n = 40$ ) were using SGLT2i. Those on SGLT2i were more likely to be male than those using

other glucose-lowering medications (63% vs. 44%). Among SGLT2i users, 12.5% ( $n = 5$ ) were not using any additional glucose-lowering medications, 37.5% ( $n = 15$ ) were using a sulfonylurea, and 50% ( $n = 20$ ) were using other glucose-lowering medications.

Mean serum 1,5-AG was 2.6  $\mu\text{g/mL}$  among SGLT2i users compared with 12.0  $\mu\text{g/mL}$  (78% difference) among users of other glucose-lowering medications (Fig. 1). Among SGLT2i users, 93% had 1,5-AG <6  $\mu\text{g/mL}$  compared with 24% in nonusers. Additionally, among SGLT2i users, 12.5% had 1,5-AG >3  $\mu\text{g/mL}$  compared with 91.3% among users of other glucose-lowering medications.

In older adults with diabetes, we observed very low blood concentrations of 1,5-AG among SGLT2i users compared with nonusers.

Our results are consistent with a post hoc analysis of a phase 3 trial of canagliflozin in 40 patients with type 2 diabetes that found that after 26 weeks, 1,5-AG was significantly lowered by canagliflozin use but not by placebo. The mean change in 1,5-AG in the canagliflozin arm was  $-5.7 \mu\text{g/mL}$ , and the mean change in the placebo arm was 1.0  $\mu\text{g/mL}$  (difference of  $-6.8 \mu\text{g/mL}$ ) (5). These findings and ours support the notion that SGLT2i use affects the concentration of 1,5-AG.

<sup>1</sup>Department of Epidemiology and the Welch Center for Prevention, Epidemiology, and Clinical Research, Johns Hopkins Bloomberg School of Public Health, Baltimore, MD

<sup>2</sup>Division of Epidemiology and Community Health, University of Minnesota School of Public Health, Minneapolis, MN

<sup>3</sup>University of North Carolina Gillings School of Public Health, Chapel Hill, NC

<sup>4</sup>Division of Endocrinology, Diabetes, and Metabolism, Department of Medicine, Johns Hopkins University School of Medicine, Baltimore, MD

Corresponding author: Elizabeth Selvin, [eselvin@jhu.edu](mailto:eselvin@jhu.edu)

Received 27 October 2023 and accepted 10 November 2023

© 2024 by the American Diabetes Association. Readers may use this article as long as the work is properly cited, the use is educational and not for profit, and the work is not altered. More information is available at <https://www.diabetesjournals.org/journals/pages/license>.

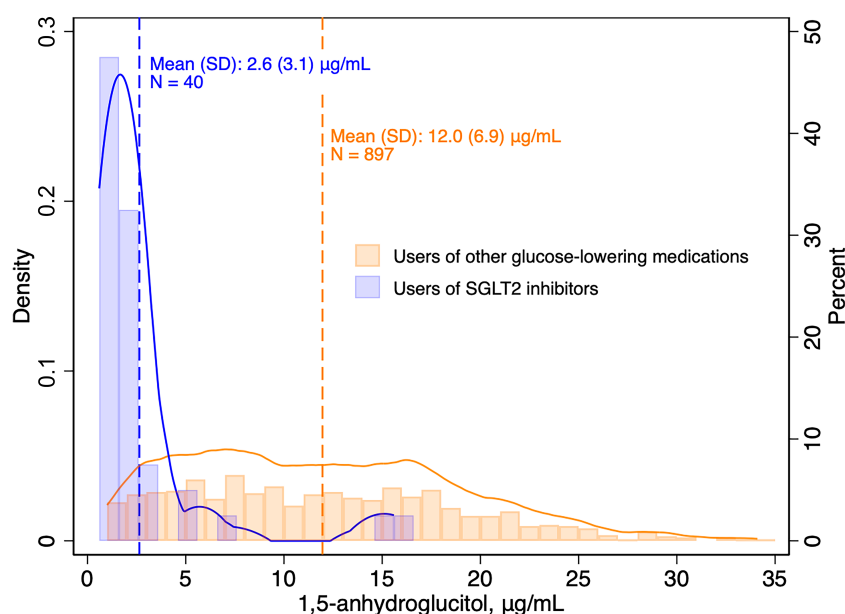

**Figure 1**—Distribution of 1,5-AG according to use of SGLT2i in the ARIC study (2016–2022).

Our study is the largest investigation to date to assess concentrations of 1,5-AG in people using SGLT2i. Limitations of our study include that we only had a single measure of 1,5-AG, we were unable to compare the concentrations of 1,5-AG before and after initiation of SGLT2i, and there may have been some misclassification of SGLT2i use.

The very low blood concentrations of 1,5-AG in users of SGLT2i in this community-based cohort support that 1,5-AG may be a useful biomarker of SGLT2i use. Our findings suggest that 1,5-AG may be useful in clinical research and trials as a marker of adherence. Larger studies with measurements of 1,5-AG

before and after initiation of SGLT2i are needed to confirm our findings.

**Acknowledgments.** The authors thank the staff and participants of the ARIC study for their important contributions.

**Funding.** The ARIC study has been funded in whole or in part with federal funds from the National Heart, Lung, and Blood Institute (NHLBI), National Institutes of Health (NIH), Department of Health and Human Services, under contract nos. 75N92022D00001, 75N92022D00002, 75N92022D00003, 75N92022D00004, and 75N92022D00005. N.R.D. was supported by NIH/NHLBI grant T32 HL007024. J.B.E.-T. was supported by NIH/NHLBI grant K23 HL153774. P.L.L. was supported by NIH/NHLBI grant K24

HL159246. E.S. was supported by NIH/NHLBI grant K24 HL152440. E.S. was supported by NIH, National Institute of Diabetes and Digestive and Kidney Diseases, grants R01 DK128837 and R01 DK128900, NIH/NHLBI grants K24 HL152440 and R01 HL158022, and NIH, National Institute on Aging, grant RF1 AG074044. Reagents for the 1,5-AG assays were donated by Precision Diabetes, Inc.

**Duality of Interest.** No potential conflicts of interest relevant to this article were reported.

**Author Contributions.** N.R.D. and M.M. drafted the initial manuscript. N.R.D., M.F., M.M., J.S., J.P., P.L.L., A.V., J.B.E.-T., and E.S. contributed to the study concept and design and interpretation of the data. All authors approved the final version of the manuscript. N.R.D. is the guarantor of this work and, as such, had full access to all the data in the study and takes responsibility for the integrity of the data and the accuracy of the data analysis.

E.S. is an editor of *Diabetes Care* but was not involved in any of the decisions regarding review of the manuscript or its acceptance.

## References

1. Yamanouchi T, Akanuma Y. Serum 1,5-anhydroglucitol (1,5 AG): new clinical marker for glycemic control. *Diabetes Res Clin Pract* 1994; 24(Suppl.):S261–S268
2. U.S. Food and Drug Administration. 510(k) Substantial Equivalence Determination Decision Summary. U.S. Food and Drug Administration, 2003. Accessed 15 August 2023. Available from [https://www.accessdata.fda.gov/cdrh\\_docs/reviews/K031604.pdf](https://www.accessdata.fda.gov/cdrh_docs/reviews/K031604.pdf)
3. Dungan KM. 1,5-anhydroglucitol (GlycoMark) as a marker of short-term glycemic control and glycemic excursions. *Expert Rev Mol Diagn* 2008;8:9–19
4. Yamanouchi T, Tachibana Y, Akanuma H, et al. Origin and disposal of 1,5-anhydroglucitol, a major polyol in the human body. *Am J Physiol* 1992;263:E268–E273
5. Balis DA, Tong C, Meininger G. Effect of canagliflozin, a sodium-glucose cotransporter 2 inhibitor, on measurement of serum 1,5-anhydroglucitol. *J Diabetes* 2014;6:378–380
